# Supplementary material for: Long Noncoding RNA HCP5, a Hybrid HLA Class I Endogenous Retroviral Gene: Structure, Expression, and Disease Associations
Source: MDPI journal article supplement (doi:10.3390/cells8050480), 2019-05-20
Supplement: s1 [file s1]

**Table S4.** Internet databases with predicted HCP5 associated transcription factors (TFs).

| TF datasets and (webpage)                                                                                                                                                                                                                                    | No. TF |
|--------------------------------------------------------------------------------------------------------------------------------------------------------------------------------------------------------------------------------------------------------------|--------|
| JASPAR Predicted Transcription Factor Targets<br>( <a href="http://amp.pharm.mssm.edu/Harmonizome/dataset/JASPAR+Predicted+Transcription+Factor+Targets">http://amp.pharm.mssm.edu/Harmonizome/dataset/JASPAR+Predicted+Transcription+Factor+Targets</a> )   | 57     |
| MotifMap Predicted Transcription Factor Targets<br><a href="http://amp.pharm.mssm.edu/Harmonizome/dataset/MotifMap+Predicted+Transcription+Factor+Targets">http://amp.pharm.mssm.edu/Harmonizome/dataset/MotifMap+Predicted+Transcription+Factor+Targets</a> | 7      |
| TRANSFAC Curated Transcription Factor Targets<br><a href="http://amp.pharm.mssm.edu/Harmonizome/dataset/TRANSFAC+Curated+Transcription+Factor+Targets">http://amp.pharm.mssm.edu/Harmonizome/dataset/TRANSFAC+Curated+Transcription+Factor+Targets</a>       | 1      |
| TRANSFAC Predicted Transcription Factor Targets<br><a href="http://amp.pharm.mssm.edu/Harmonizome/dataset/TRANSFAC+Predicted+Transcription+Factor+Targets">http://amp.pharm.mssm.edu/Harmonizome/dataset/TRANSFAC+Predicted+Transcription+Factor+Targets</a> | 13     |
| GeneHancer (GH) Regulatory Elements<br><a href="https://www.genecards.org/cgi-bin/carddisp.pl?gene=HCP5">https://www.genecards.org/cgi-bin/carddisp.pl?gene=HCP5</a>                                                                                         | 11     |
